# Supplementary material
Source: PubMed Central journal article supplement (PMC2964252)
Supplement: 1009700107_pnas.201009700SI.pdf [file 1009700107_pnas.201009700SI.pdf]

# Supporting Information

Zhang et al. 10.1073/pnas.1009700107

## SI Methods

**Gene-Modified Mice.** *Nox4*-null mice were generated by targeted deletion of the translation initiation site and exons 1 and 2 of the gene (Genoway). A 5' murine *Nox4* genomic DNA fragment was isolated from a 129sv DNA BAC library and used to generate a targeting construct containing exons 1 and 2 flanked by loxP sites, a negative-selection diphtheria toxin A cassette and a positive selection neomycin cassette flanked by Flippase Recognition Target sites. The targeting construct was electroporated into 129sv embryonic stem cells, recombinant clones identified by PCR and Southern blot analysis, and injected into C57BL/6 blastocysts. Heterozygous mice obtained from germline chimeras were bred with C57BL/6 Cre-deletor mice and Flp-deletor mice to generate heterozygous knockout (KO) mice. *Nox4*-null animals were obtained by intercrossing progeny and were backcrossed >10 generations with C57BL/6 mice.

To generate cardiomyocyte-targeted *Nox4*-transgenic mice, the mouse *Nox4* cDNA was cloned downstream of the mouse  $\alpha$ -myosin heavy chain promoter (courtesy of J. Robbins, Children's Hospital, Cincinnati, OH). The construct was linearized and microinjected into fertilized CBA/C57BL/6 pronuclei. Positive founders were identified by PCR and were backcrossed for >10 generations onto a C57BL/6 background.

**Aortic Constriction.** All procedures were performed in accordance with the Guidance on the Operation of the Animals (Scientific Procedures) Act, 1986 (United Kingdom). We studied male *Nox4*-null mice or *Nox4*-transgenic mice and respective matched wild-type littermates, all on a C57BL/6 background. Aortic constriction was induced in  $\approx$ 20-g mice by suprarenal banding under 2% isoflurane anesthesia, as previously described (1). Sham constriction involved identical surgery apart from band placement. Animals were studied up to 9 wk postsurgery. Aortic constriction resulted in similar rises in invasively measured systolic pressure among groups. There were no differences in mortality between mouse strains.

**Echocardiography and Cardiac Hemodynamics.** Mice were anesthetized with 1.5% isoflurane and imaged using a Sonos 5500 Imaging System with a 15-MHz linear transducer (Philips) or a Visualsonics Vevo 2100 ultrasound system with a 40-MHz transducer. For in vivo closed-chest LV pressure–volume analyses, animals were anesthetized with 2% isoflurane, and a 1.4F microconductance pressure catheter (ARIA SPR-853; Millar Instruments) was inserted via the right carotid artery into the left ventricle (LV) (2). Inferior vena cava occlusions were performed to generate end-systolic pressure–volume relations. Data were collected on Chart via Powerlab (Adinstruments) and analyzed using PVAN software (Millar Instruments). Heart rates were above 400 bpm in all experiments.

**Real-Time RT-PCR.** An Applied Biosystems PRISM 7700 machine was used with SYBR Green and the comparative cycle threshold method, with  $\beta$ -actin as internal controls. Oligonucleotide primers (forward, reverse) were the following: *Nox4* (mouse) TGAAC-TACAGTGAAGATTCCTTGAAC, GACACCCGTCAGAC-CAGGAAT; *Nox4* (rat) GCCTAGGATTGTGTTTGTGAGCAGA, GCGAAGGTAAGCCAGGACTGT; *Hif1 $\alpha$*  (mouse) CACC-GATTTCGCCATGGA, TTCGACGTTTCAGAACTCATCTTTT; *Hif1 $\alpha$*  (rat) GCTGCCTCTTCGACAAGCTT, CAGCCGCTG-GAGCTAGCA; and  $\beta$ -actin CGTGAAAAGATGACCCAGATCA, TGGTACGACCAGAGGCATACAG.

**Histology.** Hearts that were in situ fixed in diastole were paraffin-embedded. To assess whole-heart morphology, longitudinal sections were prepared and stained with hematoxylin and eosin. For all other histology, 6- $\mu$ m transverse cross-sections were used. FITC-conjugated wheat germ agglutinin (FITC-WGA, Vector RL-1022) was used to outline cardiomyocytes. Interstitial fibrosis was assessed by blinded quantitative image analysis (Openlab, Improvion) of Picrosirius red-stained sections (3). Capillaries were immunostained with isolectin B4 (Vector B-1205) and capillary density quantified as the number of capillaries per square millimeter (4). Apoptosis was assessed by TUNEL staining (Millipore S7110 kit). VEGF in the LV was detected with an anti-VEGF primary antibody, which was visualized with Alexa 568-conjugated anti-rabbit IgG (Molecular Probes).

**Western Blotting and Protein Kinase Profiling.** LV homogenates or cell lysates were separated by SDS/PAGE and transferred onto nitrocellulose membranes. Nuclear proteins were extracted as described (5). For the detection of hydroxylated Hif1 $\alpha$ , Mg132 (5  $\mu$ mol/L) was added immediately before cell lysis and also included in the lysis buffer. Antibodies used were the following: *Nox4* (6); *Nox2* and endothelial nitric oxide synthase (eNOS) (BD Transduction); p22<sup>phox</sup> (Santa Cruz Biotechnology); HIF-1 $\alpha$  (Thermo Scientific); HIF-1 $\alpha$  hydroxylated-Pro<sup>402</sup> and -Pro<sup>564</sup>, nitrotyrosine, and VEGF (Abcam); and pAkt (S473), pan-Akt, and histone-H3 (Cell Signaling). Actin (Sigma) was used as a loading control. Blots were quantified by densitometry. The protein kinase activity profiling screen was performed commercially (Kinetworks, Kinexus Bioinformatics).

**Cultured Cardiomyocyte Studies.** Primary cultures of neonatal rat cardiomyocytes (NRC) were prepared as described previously (7). Rat H9c2 cardiomyoblasts (ATCC) were cultured in DMEM high glucose supplemented with FBS (10%), streptomycin (100  $\mu$ mol/L), and penicillin (100 U/mL). Adenoviral vectors expressing mouse *Nox4* or  $\beta$ -galactosidase were generated using the AdEasy Adenoviral Vector System (Qbiogene), amplified in HEK293 cells, and isolated using the Adenopure virus purification kit (Puresyn). Cells were cultured for 24 h, infected with virus at a multiplicity of infection of 40 for 24 h, washed with PBS, and starved overnight before exposure to hypoxia. siRNA against *Nox4* (sequence 5'-GCCUGAUCCUUUUACCCAUtt-3') and a universal negative control were from Ambion. Serum and antibiotic-free siRNA-reduced serum minimum essential medium (OPTI-MEM, Invitrogen) complexes were incubated with cells for 24 h after which OPTI-MEM-free medium was replaced. Cells were used for experiments after an additional 24 h. To induce hypoxia, cells were placed in a hypoxia chamber (Stem Cell Technologies) flushed with a 95% N<sub>2</sub>/4% CO<sub>2</sub>/1% O<sub>2</sub> gas mixture for 24 h. Chemical hypoxia was induced by exposure to CoCl<sub>2</sub> (200  $\mu$ mol/L). For VEGF detection in culture supernatants, equal volumes (10 mL) derived from NRC exposed to hypoxia were centrifuged (2,000  $\times$  g for 3 min) to pull down debris, and the supernatants were dried under vacuum (Speed Vac Plus model SC-110A, Thermo Savant). Pellets were resuspended in 0.1 mL water, protein content was estimated, and samples were submitted to the usual electrophoresis procedure.

**Detection of ROS.** H<sub>2</sub>O<sub>2</sub> levels were detected with a homovanillic acid (HVA) assay by using the catalase-inhibitable signal (6). The assay was performed on NRC in six-well plates or using tissue minced into small pieces in 1 ml Hanks' balanced salt solution

with or without 750 U/mL catalase at 37°C. HVA fluorescence was detected on a plate fluorimeter (Tecan GENios). H<sub>2</sub>O<sub>2</sub> levels were estimated using a standard curve and normalized by protein content. Electron paramagnetic resonance spectroscopy (EPR) was used to measure O<sub>2</sub><sup>-</sup> generation by heart particulate fractions (8). Briefly, the particulate fraction (80 µg) was incubated with the 5,5-dimethylpyrroline-*N*-oxide (DMPO; 50 mmol/L) spin trap in PBS containing diethylene triamine penta-acetic acid (100 µmol/L), pH 7.4, for 5 min at 37 °C. NADPH (0.6 mmol/L) was added and incubated for an additional 5 min, and spectra were recorded in a Magnettech Miniscope MS2000 spectrometer. Instrument conditions were the following: microwave power—50 mW and modulation amplitude—1 Gauss (G), with a gain of  $9 \times 10^2$ . The four-line spectrum (solid circle in Fig. S2B) is consistent with a DMPO-hydroxy (DMPO-OH) radical adduct ( $a_N = 14.9$  G and  $a_H = 14.9$  G) as generated using the positive control of xanthine (0.1 mmol/L)/xanthine oxidase (0.05 U/mL) under similar conditions. The DMPO-OH adduct was quantified by assessing the height of the second peak as a linear function, using 4-hydroxy-2,2,6,6-tetramethyl-1-piperidinyloxy (Tempol) as a standard.

**Immunostaining.** Adult cardiomyocytes were isolated from adult *Nox4*-transgenic and wild-type mice using collagenase digestion.

1. Byrne JA, et al. (2003) Contrasting roles of NADPH oxidase isoforms in pressure-overload versus angiotensin II-induced cardiac hypertrophy. *Circ Res* 93:802–805.
2. Georgakopoulos D, et al. (1998) In vivo murine left ventricular pressure-volume relations by miniaturized conductance micromanometry. *Am J Physiol* 274:H1416–H1422.
3. Looi YH, et al. (2008) Involvement of Nox2 NADPH oxidase in adverse cardiac remodeling after myocardial infarction. *Hypertension* 51:319–325.
4. Hilfiker-Kleiner D, et al. (2007) A cathepsin D-cleaved 16 kDa form of prolactin mediates postpartum cardiomyopathy. *Cell* 128:589–600.
5. Novoa I, Zeng H, Harding HP, Ron D (2001) Feedback inhibition of the unfolded protein response by GADD34-mediated dephosphorylation of eIF2alpha. *J Cell Biol* 153:1011–1022.

Cells were plated onto laminin-pretreated slides, fixed, and permeabilized. After incubation with primary antibody or non-specific IgG, bound antibodies were visualized with Alexa 488 conjugated anti-rabbit or Alexa 568 conjugated anti-mouse IgG (Molecular Probes). Imaging was done on a Leica laser scanning confocal microscope (TCS-SP5).

**Endothelial Tube Formation Assay.** The cell culture supernatants (conditioned media) of NRC were used for in vitro endothelial tube formation assays. Human umbilical vein endothelial cells (HUVECs) were seeded on Matrigel-coated eight-well chamber slides and incubated with 0.4 mL conditioned medium for 4 h at 37 °C, with or without VEGF blocking antibody (2 µg/mL; R&D System, AF564) or nonspecific IgG. Tube formation was examined by phase-contrast microscopy, and Axiovision software (Carl Zeiss) was used to quantify tube formation (9). The length of tubes in three to four randomly selected fields in each well was measured and compared with untreated HUVECs.

**Statistics.** Data are presented as mean  $\pm$  SEM. Comparisons of groups were undertaken by Student's *t* test or one-way ANOVA, as appropriate. A post hoc Tukey's test was performed to isolate differences. *P* < 0.05 was considered significant.

6. Anilkumar N, Weber R, Zhang M, Brewer A, Shah AM (2008) Nox4 and nox2 NADPH oxidases mediate distinct cellular redox signaling responses to agonist stimulation. *Arterioscler Thromb Vasc Biol* 28:1347–1354.
7. Zhang M, et al. (2006) Glycated proteins stimulate reactive oxygen species production in cardiac myocytes: Involvement of Nox2 (gp91phox)-containing NADPH oxidase. *Circulation* 113:1235–1243.
8. Janiszewski M, et al. (2005) Regulation of NAD(P)H oxidase by associated protein disulfide isomerase in vascular smooth muscle cells. *J Biol Chem* 280:40813–40819.
9. Prokopi M, et al. (2009) Proteomic analysis reveals presence of platelet microparticles in endothelial progenitor cell cultures. *Blood* 114:723–732.



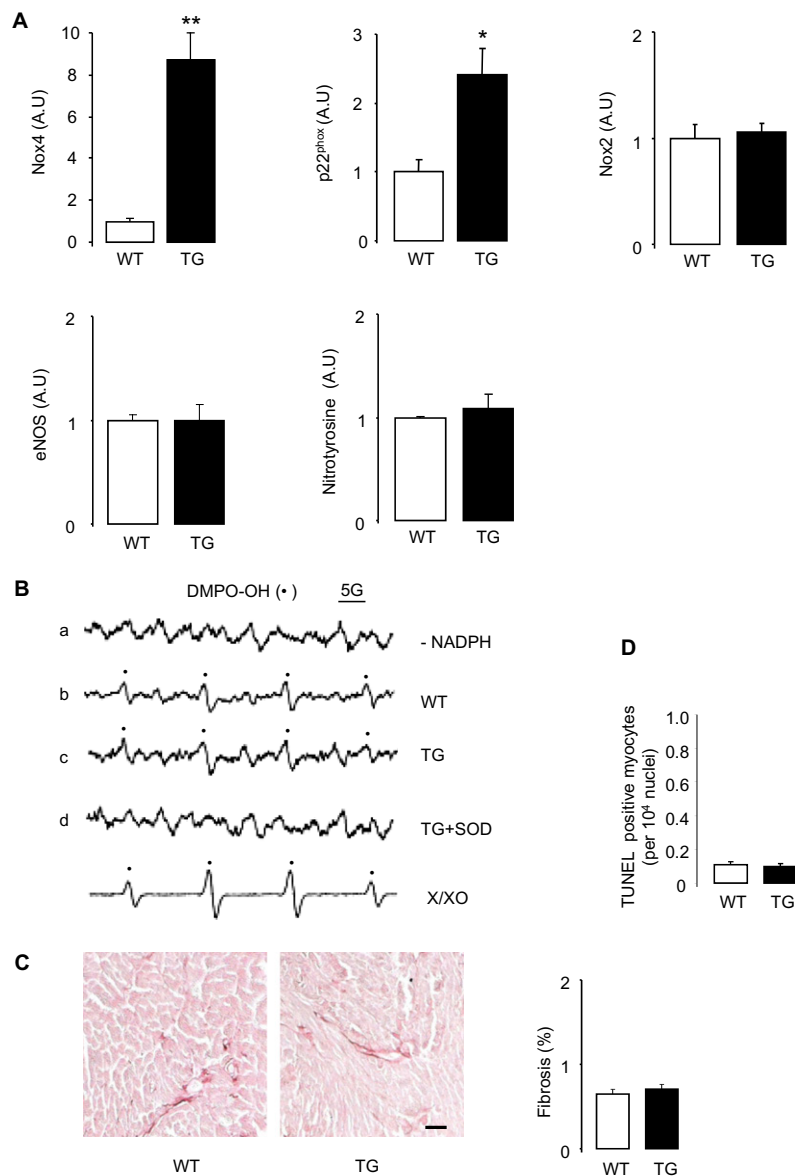

**Fig. S2.** Basal phenotype of *Nox4*-transgenic mice (TG). (A) Quantification of protein levels of Nox4, p22<sup>phox</sup>, Nox2, eNOS, and nitrotyrosine in hearts of *Nox4*-TG and wild-type littermates (WT). \*\* $P < 0.01$ ; \* $P < 0.05$ ;  $n = 3$ /group. (B) EPR spectra for detection of  $O_2^{\cdot -}$  in heart. The four-line spectrum (•) is consistent with the DMPO-OH radical adduct ( $a_N = 14.9$  G and  $a_H = 14.9$  G), as confirmed by a xanthine (0.1 mmol/L)/xanthine oxidase (0.05 U/mL) positive control under similar conditions. Inhibition of signal by superoxide dismutase (SOD) was used to confirm specificity. Measurements were made in the presence of NADPH (0.6 mmol/L) except where indicated. Mean yields (arbitrary units) from three independent experiments were the following: a and d, undetectable; b, WT =  $1.50 \pm 0.21$ ; c, TGNox4 =  $1.6 \pm 0.31$ ;  $P = NS$ . (C) Lack of increase in interstitial fibrosis in 12-mo-old *Nox4*-transgenic mice. Representative LV sections stained with Picrosirius red (scale bar: 50  $\mu$ m) and mean data from seven to nine mice/group. (D) Quantification of TUNEL staining in LV sections of 12-mo-old *Nox4*-transgenic mice and wild-type littermate controls (seven to nine mice/group).

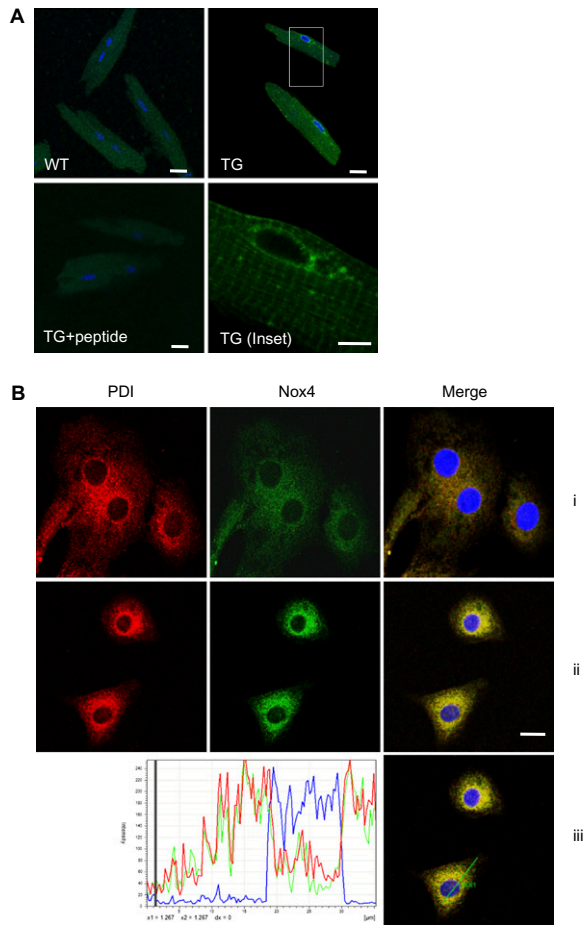

**Fig. S3.** Immunostaining for Nox4 in cardiomyocytes. (A) Nox4 immunostaining (green) in myocytes from *Nox4*-transgenic and wild-type hearts. (Lower right) A higher magnification of the boxed area in *Upper right*. Scale bars: 20 µm and 5 µm, respectively. Specificity of immunostaining was confirmed with a blocking antigenic peptide (*Lower left*). Cardiomyocyte nuclei were stained with DAPI (blue). (B) Nox4 staining in cultured cardiomyocytes. (i) Endogenous Nox4 in neonatal rat cardiomyocytes. (ii) Cells infected with a Nox4-expressing adenovirus. Cells were stained for Nox4 and for protein disulfide isomerase (PDI) as an endoplasmic reticulum marker. Yellow color in the merged images indicates colocalization. Scale bar: 20 µm. (iii) The panel at the left shows pixel-by-pixel fluorescence intensities of the two fluorophores in the cell shown at the right, along an arbitrary line, assessed using the Leica TCS-SP5 software. A significant overlapping pattern was found between Nox4 and PDI.











**Table S2. Basal characterization of *Nox4*-transgenic mice compared with WT littermates at ages 3 and 12 mo**

|                | 3 mo                |                     | 12 mo              |                    |
|----------------|---------------------|---------------------|--------------------|--------------------|
|                | WT ( <i>n</i> = 13) | TG ( <i>n</i> = 13) | WT ( <i>n</i> = 9) | TG ( <i>n</i> = 7) |
| BW (g)         | 25.8 ± 0.4          | 25.0 ± 0.3          | 40.4 ± 2.4         | 40.4 ± 2.6         |
| HW/BW (mg/g)   | 4.53 ± 0.07         | 4.75 ± 0.05         | 3.62 ± 0.09        | 4.07 ± 0.13*       |
| LV/BW (mg/g)   | 3.47 ± 0.05         | 3.57 ± 0.05         | 2.84 ± 0.06        | 3.18 ± 0.11*       |
| HR (beats/min) | 426 ± 13            | 409 ± 11            | 460 ± 17           | 489 ± 19           |
| IVSD (mm)      | 0.76 ± 0.01         | 0.80 ± 0.01         | 0.90 ± 0.05        | 1.09 ± 0.07*       |
| LVEDD (mm)     | 2.55 ± 0.03         | 2.34 ± 0.07         | 2.91 ± 0.10        | 2.79 ± 0.10        |
| LVEDD (mm)     | 4.13 ± 0.03         | 4.10 ± 0.07         | 4.19 ± 0.09        | 3.99 ± 0.08        |
| FS (%)         | 38.3 ± 0.5          | 42.9 ± 1.1*         | 30.8 ± 1.4         | 30.2 ± 1.4         |

BW, body weight; HW, heart weight; HR, heart rate; IVSD, interventricular septal thickness in diastole; LVEDD, LV end-diastolic diameter; LVEDD, LV end-systolic diameter; FS, fractional shortening. Data are means ± SEM.

\**P* < 0.05 compared with respective WT littermates.
